# Supplementary material for: Evidence of an Effect of Gaming Experience on Visuospatial Attention in Deaf but Not in Hearing Individuals
Source: Front Psychol. 2020 Oct 20;11:534741. doi: 10.3389/fpsyg.2020.534741 (PMC7606995; doi:10.3389/fpsyg.2020.534741)
Supplement: Supplementary file 1 [file Data_Sheet_1.CSV]

Participant	Gender	Group	Gaming	GamingHabits_Comp	GamingHabits_Video	Imputed_values	Age	STS_SRT	Snellen_right	Snellen_left	Pelli_right	Pelli_left	Flanker_accuracy	Flanker_congruent_rt	Flanker_incongruent_rt	flanker_all_rt	Visual_puzzles	Visual_puzzles_norm	Visual_puzzles_center	Age_center
1	1	1	1	0	4	0	31	17	9	7	2,25	2,1	47	351,5020833	484,0334783	416,3578723	22	15	3,23684210526316	-4,125
2	1	1	1	2	1	0	35	22	10	10	2,25	2,25	48	527,3958333	575,2220833	551,3089583	20	13	1,23684210526316	-,125
3	2	1	1	1	2	0	33	15	7	8	1,95	2,1	48	492,1841667	534,3820833	513,283125	9	5	-9,76315789473684	-2,125
4	1	1	1	1	1	0	26	17	9	8	1,95	1,95	48	526,20875	581,0670833	553,6379167	14	8	-4,76315789473684	-9,125
5	2	1	0	0	0	0	48	18	7	5	1,95	1,95	48	748,0179167	825,9695833	786,99375	11	7	-7,76315789473684	12,875
6	2	1	0	0	0	0	27	25	5	5	2,25	2,25	47	570,805	634,7678261	602,1059574	16	9	-2,76315789473684	-8,125
7	1	1	1	0	1	0	40	12	7	7	2,25	2,25	48	450,5320833	536,9616667	493,746875	23	16	4,23684210526316	4,875
8	1	1	0	0	0	0	44	20	6	4	2,1	2,1	48	659,3545833	752,0995833	705,7270833	19	12	,236842105263158	8,875
9	2	1	0	0	0	0	42	24	5	4	1,95	2,1	48	603,81625	651,8425	627,829375	20	13	1,23684210526316	6,875
10	2	1	1	0	1	0	38	11	7	7	2,25	2,25	48	499,1683333	512,5	505,8341667	23	16	4,23684210526316	2,875
11	2	1	0	0	0	0	40	18	8	7	2,1	2,1	47	582,6845833	701,1413043	640,652766	14	9	-4,76315789473684	4,875
12	2	1	1	1	0	0	36	21	8	9	2,1	2,1	48	459,8191667	515,8408333	487,83	21	14	2,23684210526316	,875
13	1	1	0	0	0	0	22	16	3	4	2,1	2,1	48	622,2316667	594,12875	608,1802083	13	8	-5,76315789473684	-13,125
14	2	1	0	0	0	1	23	13	4	8	2,25	2,1	47	644	720	681	20	12	1,23684210526316	-12,125
15	2	1	0	0	0	0	37	15	3	4	2,1	2,1	42	721,9678261	880,5889474	793,725	10	7	-8,76315789473684	1,875
16	1	1	1	0	2	0	40	19	5	7	1,95	2,1	40	573,9595238	681,4668421	625,0255	22	15	3,23684210526316	4,875
17	2	2	0	0	0	0	21	9999	7	7	2,25	2,25	45	469,8029167	525,7557143	495,9142222	19	11	,236842105263158	-5,45833333333333
18	1	2	1	2	0	0	30	9999	8	9	2,25	2,25	47	446,0125	469,1395652	457,33	19	12	,236842105263158	3,54166666666667
19	1	2	0	0	0	0	29	9999	8	7	1,95	2,25	47	600,32	687,6804348	643,0708511	21	13	2,23684210526316	2,54166666666667
20	2	2	0	0	0	1	34	9999	5	5	2,25	2,25	26	511	551	531	21	14	2,23684210526316	7,54166666666667
21	2	2	0	0	0	0	37	9999	7	3	2,25	1,95	48	455,4058333	503,6125	479,5091667	21	14	2,23684210526316	10,5416666666667
22	1	2	1	0	1	1	37	9999	7	8	1,95	2,25	8	528	583	555	24	17	5,23684210526316	10,5416666666667
23	2	2	0	0	0	0	39	9999	1	1	1,65	1,65	48	454,9658333	512,1233333	483,5445833	21	14	2,23684210526316	12,5416666666667
24	2	2	0	0	0	0	21	9999	7	8	2,25	2,25	48	604,9404167	577,5220833	591,23125	18	10	-,763157894736842	-5,45833333333333
25	1	2	1	0	2	0	20	9999	8	7	2,25	2,25	48	558,7345833	588,9570833	573,8458333	20	12	1,23684210526316	-6,45833333333333
26	2	2	0	0	0	0	21	9999	7	5	2,25	2,25	46	428,2516667	478,3368182	452,2054348	15	9	-3,76315789473684	-5,45833333333333
27	1	2	1	2	1	0	20	9999	3	5	2,25	2,25	47	388,8079167	471,5104348	429,2793617	24	16	5,23684210526316	-6,45833333333333
28	1	2	1	1	1	0	22	9999	3	5	2,25	2,25	48	434,8008333	504,28375	469,5422917	22	14	3,23684210526316	-4,45833333333333
29	1	2	1	0	2	0	20	9999	5	7	2,1	2,1	46	334,415	416,7945455	373,813913	13	8	-5,76315789473684	-6,45833333333333
30	2	2	0	0	0	0	20	9999	3	7	2,1	2,1	48	576,1875	589,7575	582,9725	21	13	2,23684210526316	-6,45833333333333
31	2	2	9999	9999	9999	0	21	9999	7	7	2,25	2,25	48	569,0175	701,1575	635,0875	18	10	-,763157894736842	-5,45833333333333
32	2	2	0	0	0	0	21	9999	8	4	2,1	2,1	48	527,4625	574,6441667	551,0533333	23	15	4,23684210526316	-5,45833333333333
33	1	2	0	0	0	0	20	9999	7	8	2,1	2,25	48	484,65375	505,8508333	495,2522917	20	12	1,23684210526316	-6,45833333333333
34	2	2	1	1	1	0	19	9999	6	6	2,1	2,1	48	619,5320833	720,1416667	669,836875	21	13	2,23684210526316	-7,45833333333333
35	1	2	1	0	1	0	23	9999	8	9	2,25	2,25	48	464,7983333	524,575	494,6866667	15	9	-3,76315789473684	-3,45833333333333
36	1	2	1	2	0	0	30	9999	6	7	2,1	2,1	48	866,3908333	857,87	862,1304167	22	15	3,23684210526316	3,54166666666667
37	1	2	1	4	0	0	30	9999	7	8	2,25	2,1	48	451,6341667	484,5595833	468,096875	21	14	2,23684210526316	3,54166666666667
38	1	2	1	0	1	0	39	9999	2	5	2,1	2,1	48	663,5108333	722,66625	693,0885417	17	11	-1,76315789473684	12,5416666666667
39	2	2	1	1	1	0	21	9999	8	9	2,1	2,1	48	579,33375	657,8991667	618,6164583	16	9	-2,76315789473684	-5,45833333333333
40	2	2	9999	9999	9999	0	40	9999	7	8	2,1	2,1	48	583,7858333	763,7979167	673,791875	20	13		13,5416666666667
